# Supplementary material
Source: PubMed Central journal article supplement (PMC7057684)
Supplement: ao9b04160_si_001.pdf [file ao9b04160_si_001.pdf]

## Supporting Information

### **Triptycene Based and Schiff-base Linked Porous Networks: Efficient Gas Uptake, High CO<sub>2</sub>/N<sub>2</sub> Selectivity and Excellent Antiproliferative Activities**

Akhtar Alam,<sup>†</sup> Snehasis Mishra,<sup>‡</sup> Atikur Hassan,<sup>†</sup> Ranajit Bera,<sup>†</sup> Sriparna Dutta,<sup>§</sup> Krishna Das Saha,<sup>‡</sup> and Neeladri Das<sup>\*†</sup>

<sup>†</sup>Department of Chemistry, Indian Institute of Technology Patna, Patna 801106, Bihar, India

<sup>‡</sup> Cancer & Inflammatory Disorder Division, CSIR-Indian Institute of Chemical Biology, Kolkata 700032, India

<sup>§</sup> Department of Chemical Technology, University of Calcutta, Kolkata-700009, West Bengal, India

E-mail: neeladri@iitp.ac.in, neeladri2002@yahoo.co.in; Tel.: +91 9631624708

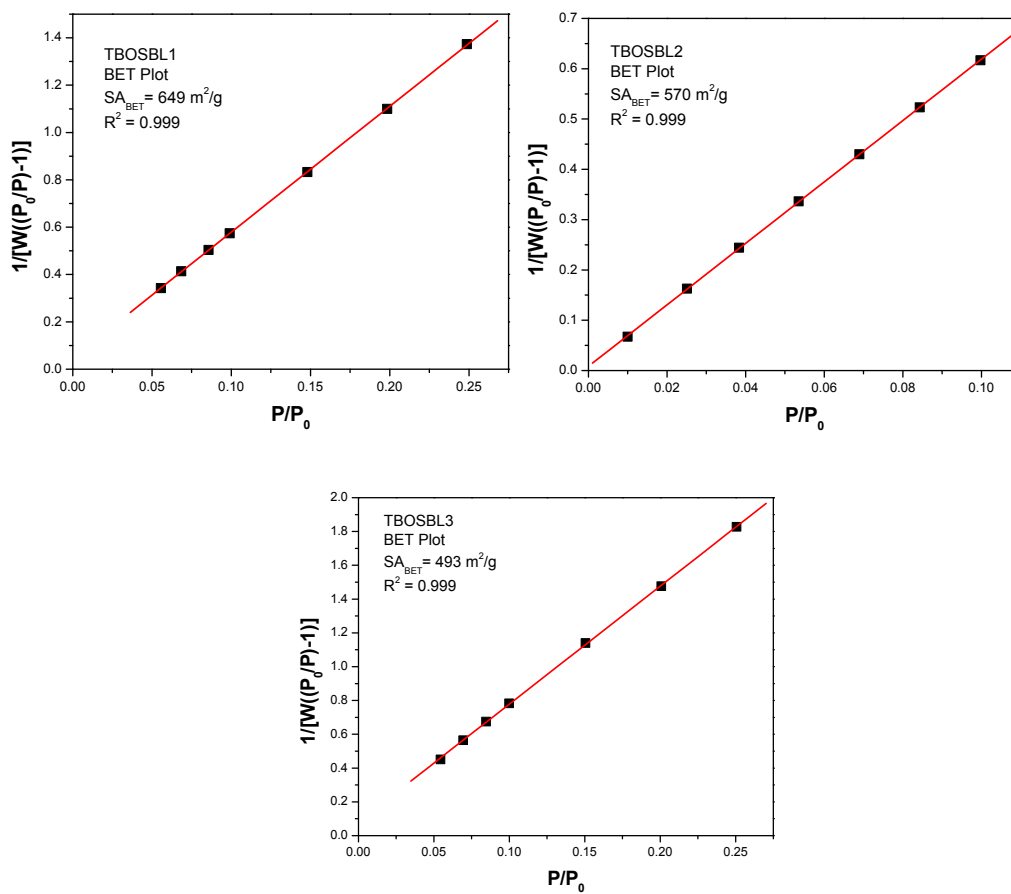

Figure S1: BET plot of TBOSBLs.

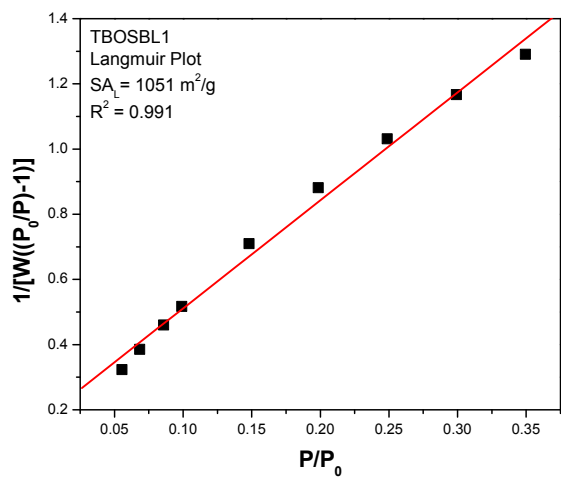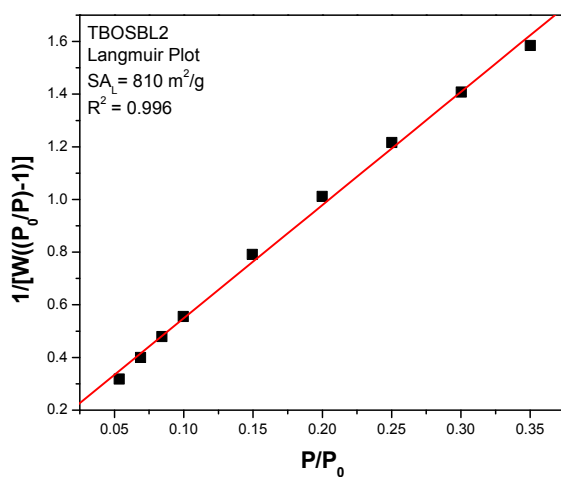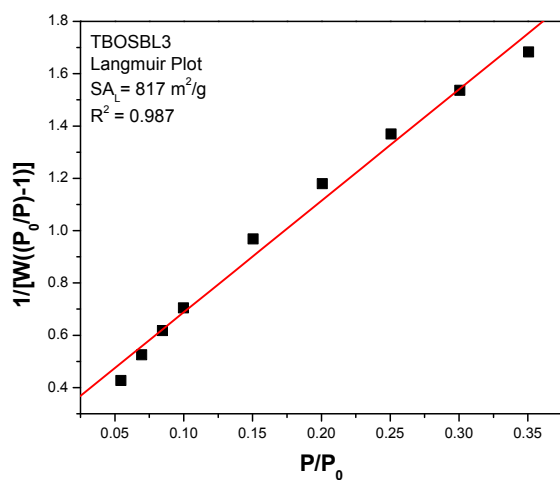

**Figure S2:** Langmuir plot of TBOSBLs.

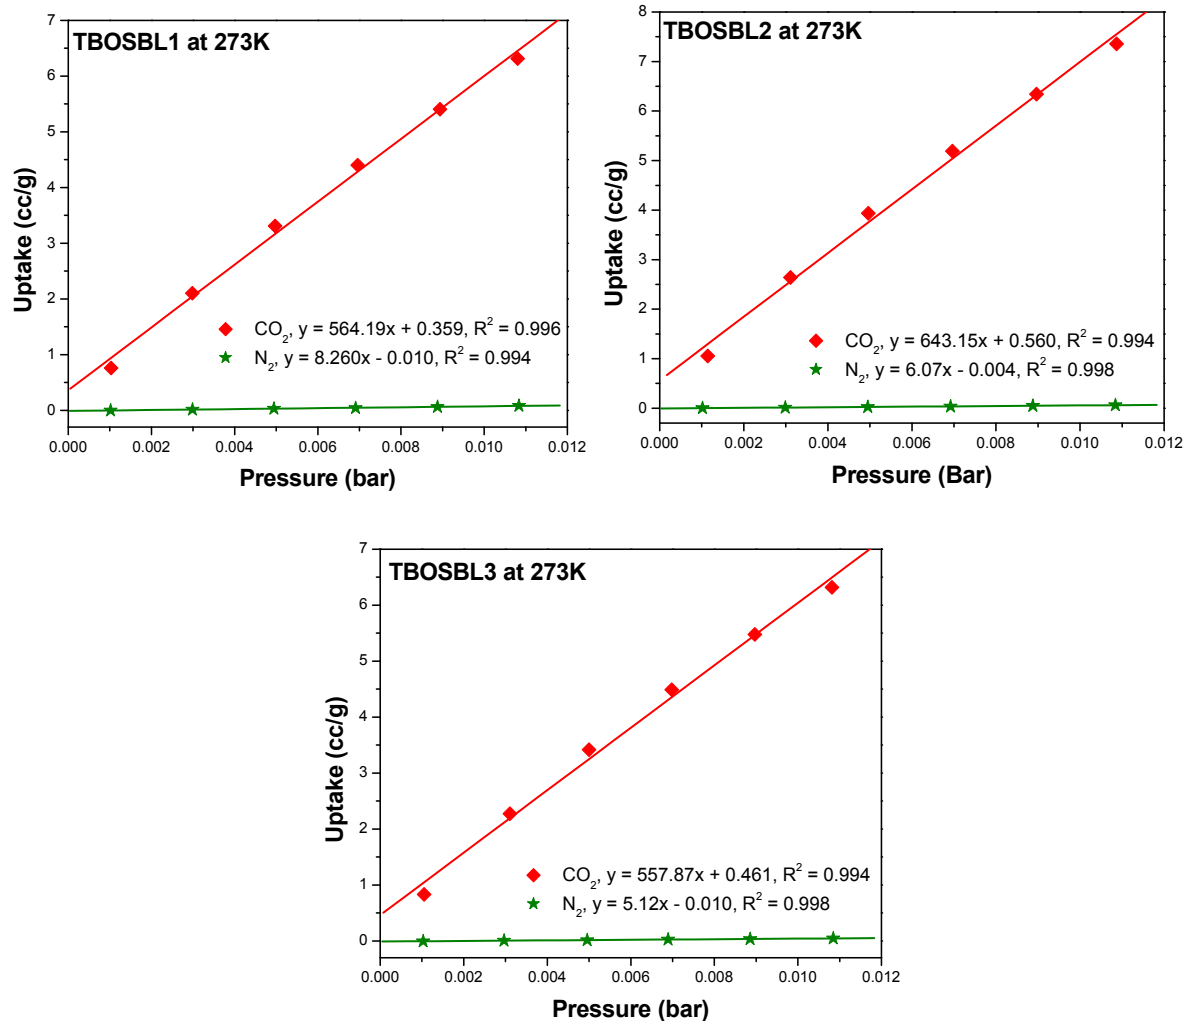

**Figure S3:** Initial gas uptake slopes of TBOSBLs at 273K.

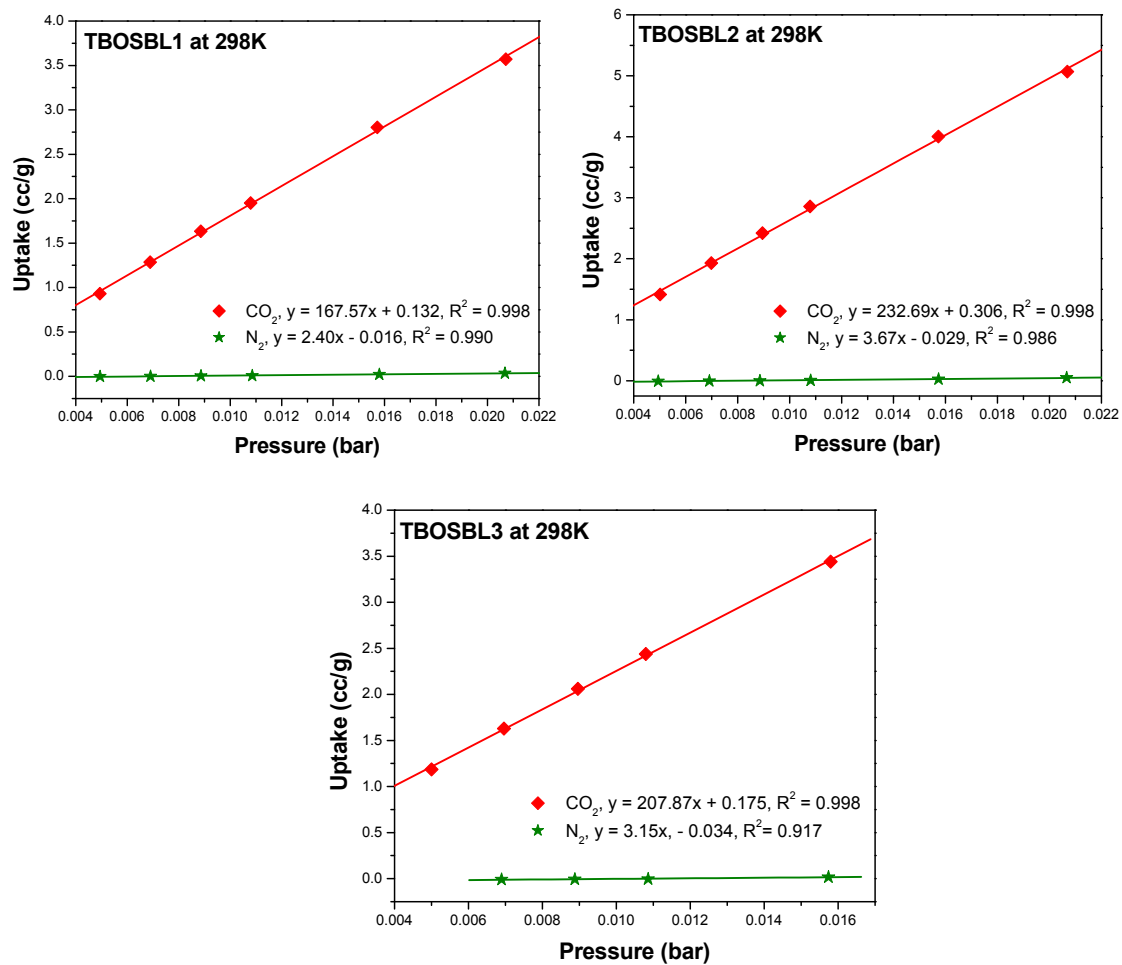

**Figure S4:** Initial gas uptake slopes of TBOSBLs at 298K.
